# Supplementary material for: Supplement Treatment with NAC and Omega-3 Polyunsaturated Fatty Acids during Pregnancy Partially Prevents Schizophrenia-Related Outcomes in the Poly I:C Rat Model
Source: MDPI journal article supplement (doi:10.3390/antiox12051068), 2023-05-09
Supplement: s1 [file s1]

# Supplementary Treatment with NAC and Omega-3 during Pregnancy Partially Prevents Schizophrenia-Related Outcomes in the Offspring of the Poly I:C Rat Model

## Supplementary information

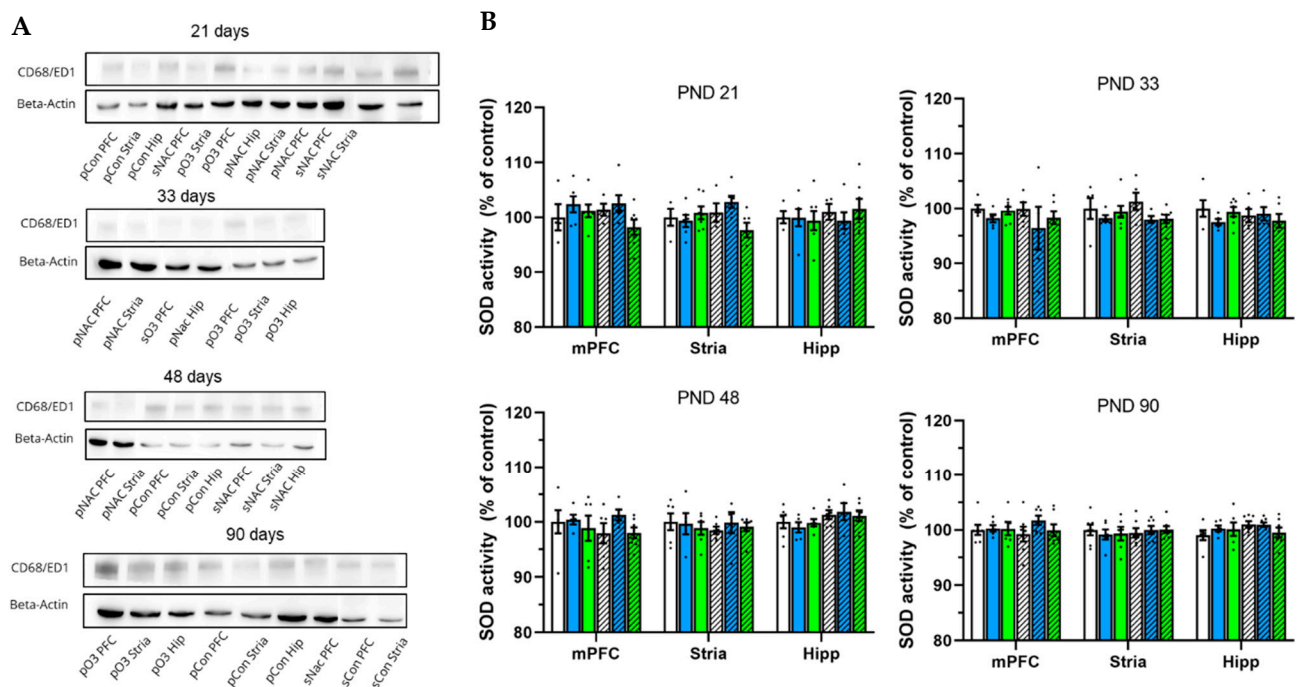

**Figure S1. Oxidative and inflammatory parameters during development** A) Western blot of CD68 intensity levels in reference to housekeeping protein beta actin, used as a marker of microglial activity assessed at PND 21, PND 33, PND 43 and PND 90 in the mPFC, striatum and hippocampus B) SOD activity levels as % of controls used to assess activity levels of anti-oxidant enzymes at PND 21, PND 33, PND 43 and PND 90 in the mPFC, striatum and hippocampus. PND: postnatal day, mPFC: medial prefrontal cortex, stria: striatum, Hipp: hippocampus, SOD: superoxide dismutase activity, CD68: cluster of differentiation 68, NAC: N-acetyl cysteine, PFC: prefrontal cortex (PND 21: n saline: control = 5, omega-3 = 6, NAC = 7; n Poly I:C: control = 5, omega-3 = 6, NAC = 7; PND 48: n saline: control = 6, omega-3 = 5, NAC = 6; n Poly I:C: control = 6, omega-3 = 5, NAC = 7; PND 33: n saline: control = 5, omega-3 = 5, NAC = 7; n Poly I:C: control = 5, omega-3 = 5, NAC = 7; PND 90: n saline: control = 7, omega-3 = 6, NAC = 6; n Poly I:C: control = 7, omega-3 = 7, NAC = 7).

**Table S1. The number of male offsprings assigned to the different investigations,** PND: post natal day, HPLC; high performance liquid chromatography, NAC: N-acetyl cysteine, MRI: Magnetic resonance imaging.

|                        | <b>Saline</b> |         |     | <b>Poly I:C</b> |         |     |
|------------------------|---------------|---------|-----|-----------------|---------|-----|
|                        | Control       | Omega-3 | NAC | Control         | Omega-3 | NAC |
| Behavior and MRI       | 12            | 11      | 10  | 12              | 10      | 14  |
| Biochemical evaluation |               |         |     |                 |         |     |
| PND 21                 | 5             | 6       | 7   | 5               | 6       | 7   |
| PND 33                 | 5             | 5       | 7   | 5               | 5       | 7   |
| PND 48                 | 6             | 5       | 6   | 6               | 5       | 7   |
| PND 90                 | 7             | 6       | 6   | 7               | 7       | 7   |
| HPLC                   |               |         |     |                 |         |     |
| PND 90                 | 7             | 7       | 8   | 8               | 7       | 9   |

**Table S2. Overview of the ANOVA effects**, including degree of freedom (DF), F-values and statistical p-values. Results presented for A) maternal state, B) CD68 activity, C) GPx activity, D) dopamine content and turnover and E) behavior and lateral ventricles. RM: repeated measures, DF: degree of freedom, PND: post natal day, mPFC: medial prefrontal cortex, stria: striatum, Hipp: hippocampus, DA: dopamine, CD68: cluster of differentiation 68, GPx: Glutathione peroxidase activity.

| A              |                             |                       |                             |        |           |         |
|----------------|-----------------------------|-----------------------|-----------------------------|--------|-----------|---------|
| Maternal state |                             |                       | RM ANOVA effects            | DF     | F-value   | p-value |
|                | Food intake                 |                       | Phenotype                   | 1,42   | 3.40      | 0.072   |
|                |                             |                       | treatment                   | 2,42   | 1.13      | > 0.05  |
|                |                             |                       | day                         | 5, 210 | 45.13     | < 0.001 |
|                |                             |                       | phenotype x treatment       | 2,42   | 1.57      | > 0.05  |
|                |                             |                       | day x phenotype             | 5, 210 | 29.87     | < 0.001 |
|                |                             |                       | day x treatment             | 5, 210 | 3.83      | < 0.001 |
|                |                             |                       | day x phenotype x treatment | 5, 210 | 1.99      | 0.036   |
|                |                             |                       | Water intake                |        | Phenotype | 1,42    |
|                | treatment                   |                       |                             | 2,42   | 0.64      | >0.05   |
|                | day                         |                       |                             | 5, 210 | 38.88     | < 0.001 |
|                | phenotype x treatment       |                       |                             | 2,42   | 0.67      | >0.05   |
|                | day x phenotype             |                       |                             | 5, 210 | 25.71     | < 0.001 |
|                | day x treatment             |                       |                             | 5, 210 | 38.006    | 0.001   |
|                | day x phenotype x treatment |                       |                             | 5, 210 | 1.65      | 0.093   |
|                |                             |                       |                             |        |           |         |
| B              |                             |                       |                             |        |           |         |
| CD68 activity  | PND                         | Area                  | 2-way ANOVA effect          | DF     | F-value   | p-value |
|                | 21                          | mPFC                  | phenotype                   | 1,28   | 13.667    | < 0.001 |
|                |                             |                       | treatment                   | 2,18   | 0.474     | 0.628   |
|                |                             |                       | phenotype x treatment       | 2,18   | 1.551     | 0.230   |
|                |                             | Stria                 | phenotype                   | 1,28   | 0.019     | 0.891   |
|                |                             |                       | treatment                   | 2,18   | 0.500     | 0.612   |
|                |                             |                       | phenotype x treatment       | 2,18   | 1.950     | 0.161   |
|                |                             | Hipp                  | phenotype                   | 1, 28  | 0.004     | 0.948   |
|                |                             |                       | treatment                   | 2,18   | 1.850     | 0.176   |
|                |                             |                       | phenotype x treatment       | 2,18   | 2.523     | 0.098   |
|                | 33                          | mPFC                  | phenotype                   | 1,28   | 0.248     | 0.623   |
|                |                             |                       | treatment                   | 2,18   | 2.622     | 0.90    |
|                |                             |                       | phenotype x treatment       | 2,18   | 2.775     | 0.08    |
|                |                             | Stria                 | phenotype                   | 1,28   | 0.383     | 0.541   |
|                |                             |                       | treatment                   | 2,18   | 1.489     | 0.243   |
|                |                             |                       | phenotype x treatment       | 2,18   | 0.556     | 0.580   |
|                |                             | Hipp                  | phenotype                   | 1, 28  | 0.800     | 0.379   |
|                |                             |                       | treatment                   | 2,18   | 1.004     | 0.379   |
|                |                             |                       | phenotype x treatment       | 2,18   | 2.122     | 0.139   |
| 48             | mPFC                        | phenotype             | 1,29                        | 0.904  | 0.349     |         |
|                |                             | treatment             | 2,29                        | 1.681  | 0.204     |         |
|                |                             | phenotype x treatment | 2,29                        | 7.132  | 0.003     |         |
|                | Stria                       | phenotype             | 1,29                        | 3.638  | 0.066     |         |

|  |    |       |                       |      |        |        |
|--|----|-------|-----------------------|------|--------|--------|
|  |    |       | treatment             | 2,29 | 3.871  | 0.032  |
|  |    |       | Phenotype x treatment | 2,29 | 10.871 | <0.001 |
|  |    | Hipp  | phenotype             | 1,29 | 7.102  | 0.012  |
|  |    |       | treatment             | 2,29 | 3.754  | 0.035  |
|  |    |       | Phenotype x treatment | 2,29 | 4.516  | 0.020  |
|  | 90 | mPFC  | phenotype             | 1,34 | 0.637  | 0.430  |
|  |    |       | treatment             | 2,34 | 1.850  | 0.173  |
|  |    |       | phenotype x treatment | 2,34 | 2.019  | 0.148  |
|  |    | Stria | phenotype             | 1,34 | 0.009  | 0.924  |
|  |    |       | treatment             | 2,34 | 0.230  | 0.796  |
|  |    |       | Phenotype x treatment | 2,34 | 1.230  | 0.305  |
|  |    | Hipp  | phenotype             | 1,34 | 0.722  | 0.401  |
|  |    |       | treatment             | 2,34 | 1.685  | 0.201  |
|  |    |       | Phenotype x treatment | 2,34 | 2.141  | 0.133  |

### C

| GPx activity | PND | Area  | 2-way ANOVA effect    | DF   | F-value | p - value |
|--------------|-----|-------|-----------------------|------|---------|-----------|
|              | 21  | mPFC  | phenotype             | 1,28 | 1.627   | 0.213     |
|              |     |       | treatment             | 2,28 | 0.883   | 0.425     |
|              |     |       | phenotype x treatment | 2,28 | 0.110   | 0.896     |
|              |     | Stria | phenotype             | 1,28 | 5.263   | 0.029     |
|              |     |       | treatment             | 2,28 | 2.183   | 0.132     |
|              |     |       | phenotype x treatment | 2,28 | 5.705   | 0.008     |
|              |     | Hipp  | phenotype             | 1,28 | 0.713   | 0.406     |
|              |     |       | treatment             | 2,28 | 0.095   | 0.909     |
|              |     |       | phenotype x treatment | 2,28 | 0.374   | 0.691     |
|              | 33  | mPFC  | phenotype             | 1,28 | 1.067   | 0.310     |
|              |     |       | treatment             | 2,28 | 1.078   | 0.354     |
|              |     |       | phenotype x treatment | 2,28 | 0.095   | 0.910     |
|              |     | Stria | phenotype             | 1,28 | 1.057   | 0.313     |
|              |     |       | treatment             | 2,28 | 0.557   | 0.579     |
|              |     |       | phenotype x treatment | 2,28 | 1.568   | 0.226     |
|              |     | Hipp  | phenotype             | 1,28 | 0.025   | 0.876     |
|              |     |       | treatment             | 2,28 | 1.287   | 0.292     |
|              |     |       | phenotype x treatment | 2,28 | 0.844   | 0.441     |
|              | 48  | mPFC  | phenotype             | 1,29 | 0.957   | 0.336     |
|              |     |       | treatment             | 2,29 | 0.335   | 0.718     |
|              |     |       | phenotype x treatment | 2,29 | 0.026   | 0.974     |
|              |     | Stria | phenotype             | 1,29 | 0.240   | 0.628     |
|              |     |       | treatment             | 2,29 | 0.759   | 0.477     |
|              |     |       | Phenotype x treatment | 2,29 | 2.434   | 0.105     |
|              |     | Hipp  | phenotype             | 1,29 | 0.020   | 0.889     |
|              |     |       | treatment             | 2,29 | 1,62    | 0.215     |

|    |       |                       |      |       |       |
|----|-------|-----------------------|------|-------|-------|
|    |       | Phenotype x treatment | 2,29 | 3.535 | 0.043 |
| 90 | mPFC  | phenotype             | 1,34 | 0.002 | 0.966 |
|    |       | treatment             | 2,34 | 1.268 | 0.294 |
|    |       | phenotype x treatment | 2,34 | 2.260 | 0.120 |
|    |       |                       |      |       |       |
|    | Stria | phenotype             | 1,34 | 0.132 | 0.719 |
|    |       | treatment             | 2,34 | 0.123 | 0.885 |
|    |       | Phenotype x treatment | 2,34 | 1.910 | 0.164 |
|    | Hipp  |                       |      |       |       |
|    |       | phenotype             | 1,34 | 1.597 | 0.215 |
|    |       | treatment             | 2,34 | 0.720 | 0.494 |
|    |       | Phenotype x treatment | 2,34 | 0.285 | 0.754 |

#### D

| DA Content  | Area  | 2-Way ANOVA           | DF   | F-value | p-Value |
|-------------|-------|-----------------------|------|---------|---------|
|             | mPFC  | phenotype             | 1,40 | 0.318   | 0.576   |
|             |       | treatment             | 2,40 | 0.200   | 0.820   |
|             |       | phenotype x treatment | 2,40 | 6.360   | 0.004   |
|             |       |                       |      |         |         |
|             | Stria | phenotype             | 1,40 | 0.455   | 0.504   |
|             |       | treatment             | 2,40 | 0.909   | 0.411   |
|             |       | phenotype x treatment | 2,40 | 0.157   | 0.855   |
|             | Hipp  | phenotype             | 1,40 | 0.777   | 0.383   |
|             |       | treatment             | 2,40 | 1.939   | 0.175   |
|             |       | phenotype x treatment | 2,40 | 5.376   | 0.009   |
| DA turnover | mPFC  | phenotype             | 1,40 | 1.081   | 0.305   |
|             |       | treatment             | 2,40 | 1.889   | 0.164   |
|             |       | phenotype x treatment | 2,40 | 3.103   | 0.056   |
|             |       |                       |      |         |         |
|             | Stria | phenotype             | 1,40 | 1.646   | 0.207   |
|             |       | treatment             | 2,40 | 0.530   | 0.593   |
|             |       | phenotype x treatment | 2,40 | 2.007   | 0.148   |
|             | Hipp  | phenotype             | 1,40 | 0.495   | 0.486   |
|             |       | treatment             | 2,40 | 2.121   | 0.133   |
|             |       | phenotype x treatment | 2,40 | 5.373   | 0.009   |

#### E

| Behavior           |                | RM ANOVA              | DF     | F-value | p-value |
|--------------------|----------------|-----------------------|--------|---------|---------|
| PPI                |                | Prepulse              | 2, 106 | 1093    | <0.001  |
|                    |                | Phenotype             | 1, 53  | 4.916   | 0.031   |
|                    |                | Treatment             | 2, 53  | 1.645   | >0.05   |
|                    |                | phenotype x treatment | 2, 53  | 3.707   | 0.030   |
|                    |                | prepulse x treatemnt  | 4, 106 | 1.73    | >0.05   |
|                    |                |                       |        |         |         |
| DR paradigm        |                | <b>Kruskal-Wallis</b> |        |         |         |
|                    | Discrimination | group                 | 5      | 2,969   | 0,705   |
|                    | Reversal       | group                 | 5      | 13,506  | 0,19    |
| Social interaction |                | <b>2- way ANOVA</b>   |        |         |         |
|                    | SniffAgen      | phenotype             | 1, 63  | 16.18   | <0.001  |
|                    |                | treatment             | 2, 63  | 2.88    | 0.063   |
|                    |                | phenotype x treatment | 2, 63  | 2.311   | 0.108   |

|                           |                       |                    |       |       |
|---------------------------|-----------------------|--------------------|-------|-------|
| SniffGen                  | phenotype             | 1, 63              | 0.647 | 0.424 |
|                           | treatment             | 2, 63              | 0.086 | 0.918 |
|                           | phenotype x treatment | 2, 63              | 1.008 | 0.371 |
| Follow/approach           | phenotype             | 1, 63              | 2.342 | 0.131 |
|                           | treatment             | 2, 63              | 0.819 | 0.445 |
|                           | phenotype x treatment | 2, 63              | 1.560 | 0.218 |
| Rearing                   | phenotype             | 1, 63              | 0.154 | 0.696 |
|                           | treatment             | 2, 63              | 0.394 | 0.676 |
|                           | phenotype x treatment | 2, 63              | 0.275 | 0.761 |
| <b>Lateral ventricles</b> |                       | <b>2-way ANOVA</b> |       |       |
|                           | phenotype             | 1, 61              | 1.95  | 0.168 |
|                           | treatment             | 2, 61              | 1.38  | 0.258 |
|                           | phenotype x treatment | 2, 61              | 3.43  | 0.039 |
